# Supplementary material for: Controlled synthesis and computational analysis of gold nanostars for the treatment of Fusarium oxysporum
Source: Royal Society of Chemistry journal article supplement (doi:10.1039/d3ra04088g), 2023-01-01
Supplement: d3ra04088g1.pdf [file d3ra04088g1.pdf]

Supplementary Information

## **Controlled Synthesis and Computational Analysis of Gold Nanostars for the Treatment of *F Oxysporum***

Gaddi B. Eshun<sup>1</sup>, Francis J. Osonga<sup>1</sup>, Taner Erdogan<sup>2</sup>, Ayşegül Gölcü<sup>3</sup> & Omowunmi A. Sadik<sup>1\*</sup>

<sup>1</sup>Department of Chemistry and Environmental Science, New Jersey Institute of Technology,  
University Heights, 151 Warren Street, Newark, NJ, 07102, USA

<sup>2</sup> Kocaeli Vocat Sch, Dept Chem & Chem Proc Technol,  
Kocaeli Univ, Kocaeli 41380, Turkey

<sup>3</sup> Department of Chemistry, Faculty of Science and Letter, Istanbul Technical University,  
Istanbul 34469, Turkey

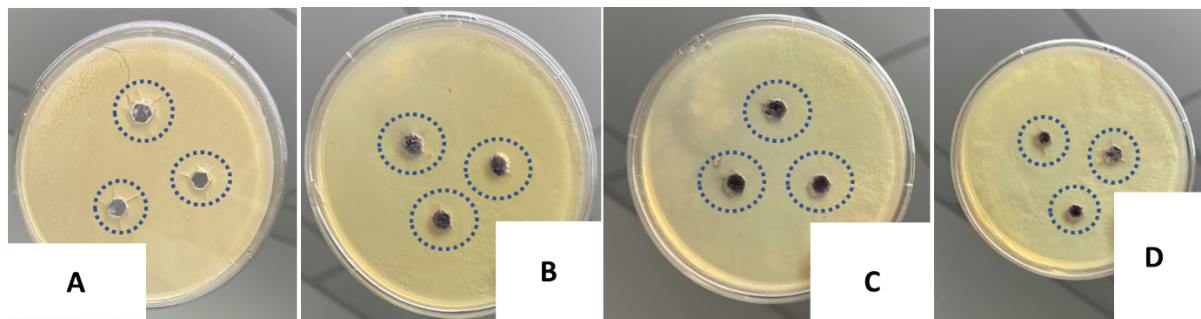

Figure S1: Concentration-dependent effect of Spherical gold nanoparticles against *F. oxysporum* (A) control, (A) 75  $\mu\text{g/ml}$  (B) 100  $\mu\text{g/ml}$  (C) 125  $\mu\text{g/ml}$
